# Supplementary material
Source: MDPI journal article supplement (https://www.mdpi.com/2306-5338/11/5/61)
Supplement: s1 [file s1]

## Supplementary Material

**Table S1.** Strategies used to refine and attain final documents from the Scopus database.

| Search string                    | Query                                                                                                                                                                                                                                                                                                                                                                                                                                                                                                                                                                                                                                                                                                                                                                                                                                                                                                                                                                                                                                                                                                                                                                                                                                          | Number of documents |
|----------------------------------|------------------------------------------------------------------------------------------------------------------------------------------------------------------------------------------------------------------------------------------------------------------------------------------------------------------------------------------------------------------------------------------------------------------------------------------------------------------------------------------------------------------------------------------------------------------------------------------------------------------------------------------------------------------------------------------------------------------------------------------------------------------------------------------------------------------------------------------------------------------------------------------------------------------------------------------------------------------------------------------------------------------------------------------------------------------------------------------------------------------------------------------------------------------------------------------------------------------------------------------------|---------------------|
| Selected keywords                | TITLE-ABS-KEY ( ( micp ) OR ( microbial AND induced AND carbonate AND precipitation ) OR ( microbial AND induced AND calcite AND precipitation ) OR ( microbially AND induced AND calcium AND carbonate AND precipitation ) AND ( hydrology ) OR ( hydraulic AND conductivities ) OR ( fluid AND injection AND experiments ) OR ( infiltration ) OR ( cementation AND solution ) OR ( injection AND rates ) OR ( fracture AND development ) OR ( matrix AND flow ) OR ( permeability ) OR ( hydraulic AND properties ) OR ( porosity ) OR ( flow AND processes ) OR ( fracture AND patterns ) OR ( pore AND volume AND ratio ) OR ( injection AND rate ) OR ( soil-water AND repellency ) OR ( aquifer AND storage ) OR ( flow AND rate ) OR ( syringe AND pump ) OR ( geo-environmental AND engineering ) OR ( groundwater AND hydraulics ) OR ( porous AND media ) OR ( water AND resources ) OR ( contaminant AND hydrology ) OR ( urea AND hydrolysis ) OR ( pore AND network ) OR ( crystal AND growth ) OR ( chemical AND precipitation ) OR ( adsorption ) OR ( ion AND exchange ) OR ( toxic AND metals ) OR ( groundwater AND hydraulics ) OR ( breakdown AND pressure ) OR ( viscous AND fluid ) OR ( infiltration AND dominance ) ) | 2522                |
| Limit document type to "article" | TITLE-ABS-KEY ( ( micp ) OR ( microbial AND induced AND carbonate AND precipitation ) OR ( microbial AND induced AND calcite AND precipitation ) OR ( microbially AND induced AND calcium AND carbonate AND precipitation ) AND ( hydrology ) OR ( hydraulic AND conductivities ) OR ( fluid AND injection AND experiments ) OR ( infiltration ) OR ( cementation AND solution ) OR ( injection AND rates ) OR ( fracture AND development ) OR ( matrix AND flow ) OR ( permeability ) OR ( hydraulic AND properties ) OR ( porosity ) OR ( flow AND processes ) OR ( fracture AND patterns ) OR ( pore AND volume AND ratio ) OR ( injection AND rate ) OR ( soil-water AND repellency ) OR ( aquifer AND storage ) OR ( flow AND rate ) OR ( syringe AND pump ) OR ( geo-environmental AND engineering ) OR ( groundwater AND hydraulics ) OR ( porous AND media ) OR ( water AND resources ) OR ( contaminant AND hydrology ) OR ( urea AND hydrolysis ) OR ( pore AND network ) OR ( crystal AND growth ) OR ( chemical AND precipitation ) OR ( adsorption ) OR ( ion AND exchange ) OR ( toxic AND metals ) OR ( groundwater AND hydraulics ) OR ( breakdown AND pressure ) OR ( viscous AND fluid ) OR (                                | 1827                |

|                                |    |                                                                                                                                                                                                                                                                                                                                                                                                                                                                                                                                                                                                                                                                                                                                                                                                                                                                                                                                                                                                                                                                                                                                                                                                                                                                                                                                                                                                                                                                                                                                     |      |
|--------------------------------|----|-------------------------------------------------------------------------------------------------------------------------------------------------------------------------------------------------------------------------------------------------------------------------------------------------------------------------------------------------------------------------------------------------------------------------------------------------------------------------------------------------------------------------------------------------------------------------------------------------------------------------------------------------------------------------------------------------------------------------------------------------------------------------------------------------------------------------------------------------------------------------------------------------------------------------------------------------------------------------------------------------------------------------------------------------------------------------------------------------------------------------------------------------------------------------------------------------------------------------------------------------------------------------------------------------------------------------------------------------------------------------------------------------------------------------------------------------------------------------------------------------------------------------------------|------|
|                                |    | infiltration AND dominance ) ) AND ( EXCLUDE ( DOCTYPE , "er" ) OR EXCLUDE ( DOCTYPE , "cr" ) OR EXCLUDE ( DOCTYPE , "ch" ) OR EXCLUDE ( DOCTYPE , "re" ) OR EXCLUDE ( DOCTYPE , "cp" ) OR EXCLUDE ( DOCTYPE , "no" ) )                                                                                                                                                                                                                                                                                                                                                                                                                                                                                                                                                                                                                                                                                                                                                                                                                                                                                                                                                                                                                                                                                                                                                                                                                                                                                                             |      |
| Limit source type to "journal" | to | TITLE-ABS-KEY ( ( micp ) OR ( microbial AND induced AND carbonate AND precipitation ) OR ( microbial AND induced AND calcite AND precipitation ) OR ( microbially AND induced AND calcium AND carbonate AND precipitation ) AND ( hydrology ) OR ( hydraulic AND conductivities ) OR ( fluid AND injection AND experiments ) OR ( infiltration ) OR ( cementation AND solution ) OR ( injection AND rates ) OR ( fracture AND development ) OR ( matrix AND flow ) OR ( permeability ) OR ( hydraulic AND properties ) OR ( porosity ) OR ( flow AND processes ) OR ( fracture AND patterns ) OR ( pore AND volume AND ratio ) OR ( injection AND rate ) OR ( soil-water AND repellency ) OR ( aquifer AND storage ) OR ( flow AND rate ) OR ( syringe AND pump ) OR ( geo-environmental AND engineering ) OR ( groundwater AND hydraulics ) OR ( porous AND media ) OR ( water AND resources ) OR ( contaminant AND hydrology ) OR ( urea AND hydrolysis ) OR ( pore AND network ) OR ( crystal AND growth ) OR ( chemical AND precipitation ) OR ( adsorption ) OR ( ion AND exchange ) OR ( toxic AND metals ) OR ( groundwater AND hydraulics ) OR ( breakdown AND pressure ) OR ( viscous AND fluid ) OR ( infiltration AND dominance ) ) AND ( EXCLUDE ( DOCTYPE , "er" ) OR EXCLUDE ( DOCTYPE , "cr" ) OR EXCLUDE ( DOCTYPE , "ch" ) OR EXCLUDE ( DOCTYPE , "re" ) OR EXCLUDE ( DOCTYPE , "cp" ) OR EXCLUDE ( DOCTYPE , "no" ) ) AND ( EXCLUDE ( SRCTYPE , "d" ) OR EXCLUDE ( SRCTYPE , "k" ) OR EXCLUDE ( SRCTYPE , "p" ) ) | 1819 |
| Limit language to "English"    | to | TITLE-ABS-KEY ( ( micp ) OR ( microbial AND induced AND carbonate AND precipitation ) OR ( microbial AND induced AND calcite AND precipitation ) OR ( microbially AND induced AND calcium AND carbonate AND precipitation ) AND ( hydrology ) OR ( hydraulic AND conductivities ) OR ( fluid AND injection AND experiments ) OR ( infiltration ) OR ( cementation AND solution ) OR ( injection AND rates ) OR ( fracture AND development ) OR ( matrix AND flow ) OR ( permeability ) OR ( hydraulic AND properties ) OR ( porosity ) OR ( flow AND processes ) OR ( fracture AND patterns ) OR ( pore AND volume AND ratio ) OR ( injection AND rate ) OR ( soil-water AND repellency ) OR ( aquifer AND storage ) OR ( flow AND rate ) OR ( syringe AND pump ) OR ( geo-environmental AND engineering ) OR ( groundwater AND hydraulics ) OR ( porous AND media ) OR ( water AND resources ) OR ( contaminant AND hydrology ) OR ( urea                                                                                                                                                                                                                                                                                                                                                                                                                                                                                                                                                                                          | 1675 |

|                                                                             |                                                                                                                                                                                                                                                                                                                                                                                                                                                                                                                                                                                                                                                                                                                                                                                                                                                                                                                                                                                                                                                                                                                                                                                                                                                                                                                                                                                                                                                                                                                                                                                                                                                                                                                                                                                                                              |      |
|-----------------------------------------------------------------------------|------------------------------------------------------------------------------------------------------------------------------------------------------------------------------------------------------------------------------------------------------------------------------------------------------------------------------------------------------------------------------------------------------------------------------------------------------------------------------------------------------------------------------------------------------------------------------------------------------------------------------------------------------------------------------------------------------------------------------------------------------------------------------------------------------------------------------------------------------------------------------------------------------------------------------------------------------------------------------------------------------------------------------------------------------------------------------------------------------------------------------------------------------------------------------------------------------------------------------------------------------------------------------------------------------------------------------------------------------------------------------------------------------------------------------------------------------------------------------------------------------------------------------------------------------------------------------------------------------------------------------------------------------------------------------------------------------------------------------------------------------------------------------------------------------------------------------|------|
|                                                                             | <p>AND hydrolysis ) OR ( pore AND network ) OR ( crystal AND growth ) OR ( chemical AND precipitation ) OR ( adsorption ) OR ( ion AND exchange ) OR ( toxic AND metals ) OR ( groundwater AND hydraulics ) OR ( breakdown AND pressure ) OR ( viscous AND fluid ) OR ( infiltration AND dominance ) ) AND ( EXCLUDE ( DOCTYPE , "er" ) OR EXCLUDE ( DOCTYPE , "cr" ) OR EXCLUDE ( DOCTYPE , "ch" ) OR EXCLUDE ( DOCTYPE , "re" ) OR EXCLUDE ( DOCTYPE , "cp" ) OR EXCLUDE ( DOCTYPE , "no" ) ) AND ( EXCLUDE ( SRCTYPE , "d" ) OR EXCLUDE ( SRCTYPE , "k" ) OR EXCLUDE ( SRCTYPE , "p" ) ) AND ( EXCLUDE ( LANGUAGE , "French" ) OR EXCLUDE ( LANGUAGE , "Hungarian" ) OR EXCLUDE ( LANGUAGE , "Japanese" ) OR EXCLUDE ( LANGUAGE , "Korean" ) OR EXCLUDE ( LANGUAGE , "Ukrainian" ) OR EXCLUDE ( LANGUAGE , "Polish" ) OR EXCLUDE ( LANGUAGE , "Chinese" ) )</p>                                                                                                                                                                                                                                                                                                                                                                                                                                                                                                                                                                                                                                                                                                                                                                                                                                                                                                                                                           |      |
| <p>Boolean was used to eliminate review papers "AND NOT (TITLE review)"</p> | <p>TITLE-ABS-KEY ( ( micp ) OR ( microbial AND induced AND carbonate AND precipitation ) OR ( microbial AND induced AND calcite AND precipitation ) OR ( microbially AND induced AND calcium AND carbonate AND precipitation ) AND ( hydrology ) OR ( hydraulic AND conductivities ) OR ( fluid AND injection AND experiments ) OR ( infiltration ) OR ( cementation AND solution ) OR ( injection AND rates ) OR ( fracture AND development ) OR ( matrix AND flow ) OR ( permeability ) OR ( hydraulic AND properties ) OR ( porosity ) OR ( flow AND processes ) OR ( fracture AND patterns ) OR ( pore AND volume AND ratio ) OR ( injection AND rate ) OR ( soil-water AND repellency ) OR ( aquifer AND storage ) OR ( flow AND rate ) OR ( syringe AND pump ) OR ( geo-environmental AND engineering ) OR ( groundwater AND hydraulics ) OR ( porous AND media ) OR ( water AND resources ) OR ( contaminant AND hydrology ) OR ( urea AND hydrolysis ) OR ( pore AND network ) OR ( crystal AND growth ) OR ( chemical AND precipitation ) OR ( adsorption ) OR ( ion AND exchange ) OR ( toxic AND metals ) OR ( groundwater AND hydraulics ) OR ( breakdown AND pressure ) OR ( viscous AND fluid ) OR ( infiltration AND dominance ) ) AND NOT ( title AND review ) AND ( EXCLUDE ( SRCTYPE , "d" ) OR EXCLUDE ( SRCTYPE , "k" ) OR EXCLUDE ( SRCTYPE , "p" ) ) AND ( EXCLUDE ( DOCTYPE , "er" ) OR EXCLUDE ( DOCTYPE , "cr" ) OR EXCLUDE ( DOCTYPE , "ch" ) OR EXCLUDE ( DOCTYPE , "re" ) OR EXCLUDE ( DOCTYPE , "cp" ) OR EXCLUDE ( DOCTYPE , "no" ) ) AND ( EXCLUDE ( LANGUAGE , "French" ) OR EXCLUDE ( LANGUAGE , "Hungarian" ) OR EXCLUDE ( LANGUAGE , "Japanese" ) OR EXCLUDE ( LANGUAGE , "Korean" ) OR EXCLUDE ( LANGUAGE , "Ukrainian" ) OR EXCLUDE ( LANGUAGE , "Polish" ) OR EXCLUDE ( LANGUAGE ,</p> | 1221 |

---

|                            |          |                                                                                                                                                                                                                                                                                                                                                                                                                                                                                                                                                                                                                                                                                                                                                                                                                                                                                                                                                                                                                                                                                                                                                                                                                                                                                                                                                                                                                                                                                                                                                                                                                                                                                                                                                                                                                                                                                                                                                                                                                                                                                                                                                                                                                                                                                                                                                                                                                                                                                                                                                                                                                                                                                                                                                   |
|----------------------------|----------|---------------------------------------------------------------------------------------------------------------------------------------------------------------------------------------------------------------------------------------------------------------------------------------------------------------------------------------------------------------------------------------------------------------------------------------------------------------------------------------------------------------------------------------------------------------------------------------------------------------------------------------------------------------------------------------------------------------------------------------------------------------------------------------------------------------------------------------------------------------------------------------------------------------------------------------------------------------------------------------------------------------------------------------------------------------------------------------------------------------------------------------------------------------------------------------------------------------------------------------------------------------------------------------------------------------------------------------------------------------------------------------------------------------------------------------------------------------------------------------------------------------------------------------------------------------------------------------------------------------------------------------------------------------------------------------------------------------------------------------------------------------------------------------------------------------------------------------------------------------------------------------------------------------------------------------------------------------------------------------------------------------------------------------------------------------------------------------------------------------------------------------------------------------------------------------------------------------------------------------------------------------------------------------------------------------------------------------------------------------------------------------------------------------------------------------------------------------------------------------------------------------------------------------------------------------------------------------------------------------------------------------------------------------------------------------------------------------------------------------------------|
|                            |          | "Chinese" ) )                                                                                                                                                                                                                                                                                                                                                                                                                                                                                                                                                                                                                                                                                                                                                                                                                                                                                                                                                                                                                                                                                                                                                                                                                                                                                                                                                                                                                                                                                                                                                                                                                                                                                                                                                                                                                                                                                                                                                                                                                                                                                                                                                                                                                                                                                                                                                                                                                                                                                                                                                                                                                                                                                                                                     |
| Remove papers based on EID | unwanted | TITLE-ABS-KEY ( ( micp ) OR ( microbial AND induced AND carbonate AND precipitation ) OR ( microbial AND induced AND calcite AND precipitation ) OR ( microbially AND induced AND calcium AND carbonate AND precipitation ) AND ( hydrology ) OR ( hydraulic AND conductivities ) OR ( fluid AND injection AND experiments ) OR ( infiltration ) OR ( cementation AND solution ) OR ( injection AND rates ) OR ( fracture AND development ) OR ( matrix AND flow ) OR ( permeability ) OR ( hydraulic AND properties ) OR ( porosity ) OR ( flow AND processes ) OR ( fracture AND patterns ) OR ( pore AND volume AND ratio ) OR ( injection AND rate ) OR ( soil-water AND repellency ) OR ( aquifer AND storage ) OR ( flow AND rate ) OR ( syringe AND pump ) OR ( geo-environmental AND engineering ) OR ( groundwater AND hydraulics ) OR ( porous AND media ) OR ( water AND resources ) OR ( contaminant AND hydrology ) OR ( urea AND hydrolysis ) OR ( pore AND network ) OR ( crystal AND growth ) OR ( chemical AND precipitation ) OR ( adsorption ) OR ( ion AND exchange ) OR ( toxic AND metals ) OR ( groundwater AND hydraulics ) OR ( breakdown AND pressure ) OR ( viscous AND fluid ) OR ( infiltration AND dominance ) ) AND NOT ( title AND review ) AND NOT EID ( 2-s2.0-1842719781 OR 2-s2.0-0036800835 OR 2-s2.0-33748045836 OR 2-s2.0-0034793915 OR 2-s2.0-41049109163 OR 2-s2.0-84864310755 OR 2-s2.0-0030426444 OR 2-s2.0-0036827271 OR 2-s2.0-33947313011 OR 2-s2.0-84855821379 OR 2-s2.0-77649178057 OR 2-s2.0-33749099519 OR 2-s2.0-0342632433 OR 2-s2.0-84862266120 OR 2-s2.0-25144456050 OR 2-s2.0-0034932442 OR 2-s2.0-84873324461 OR 2-s2.0-0000112293 OR 2-s2.0-15744380435 OR 2-s2.0-32844474159 OR 2-s2.0-0035973222 OR 2-s2.0-33845709797 OR 2-s2.0-79955791180 OR 2-s2.0-33745130782 OR 2-s2.0-1542290606 OR 2-s2.0-53349107368 OR 2-s2.0-84863305456 OR 2-s2.0-33644866869 OR 2-s2.0-14344273767 OR 2-s2.0-84858704724 OR 2-s2.0-0033166304 OR 2-s2.0-84858986512 OR 2-s2.0-5044226966 OR 2-s2.0-0033387133 OR 2-s2.0-84873317955 OR 2-s2.0-64549116273 OR 2-s2.0-58149474174 OR 2-s2.0-80054948468 OR 2-s2.0-79955836066 OR 2-s2.0-79955545914 OR 2-s2.0-84857910088 OR 2-s2.0-4243148638 OR 2-s2.0-0030752246 OR 2-s2.0-70350154696 OR 2-s2.0-0028986254 OR 2-s2.0-77954009948 OR 2-s2.0-21344456796 OR 2-s2.0-84859620933 OR 2-s2.0-59249096785 ) AND ( EXCLUDE ( SRCTYPE , "d" ) OR EXCLUDE ( SRCTYPE , "k" ) OR EXCLUDE ( SRCTYPE , "p" ) ) AND ( EXCLUDE ( DOCTYPE , "er" ) OR EXCLUDE ( DOCTYPE , "cr" ) OR EXCLUDE ( DOCTYPE , "ch" ) OR EXCLUDE ( DOCTYPE , "re" ) OR EXCLUDE ( DOCTYPE , "cp" ) OR EXCLUDE ( DOCTYPE , "no" ) ) AND ( EXCLUDE ( LANGUAGE , "French" ) OR EXCLUDE ( LANGUAGE , |

---

|                                                                                                                                                        |                                                                                                                                                                                                                                                                                                                                                                                                                                                                                                                                                                                                                                                                                                                                                                                                                                                                                                                                                                                                                                                                                                                                                                                                                                                                                                                                                                                                                                                                                                                                                                                                                                                                                                                                                                                                                                                                                                                                                                                                                                                                                                                                                                                                                                                                                                                                                                                                                                                                                                                                                                                                     |      |
|--------------------------------------------------------------------------------------------------------------------------------------------------------|-----------------------------------------------------------------------------------------------------------------------------------------------------------------------------------------------------------------------------------------------------------------------------------------------------------------------------------------------------------------------------------------------------------------------------------------------------------------------------------------------------------------------------------------------------------------------------------------------------------------------------------------------------------------------------------------------------------------------------------------------------------------------------------------------------------------------------------------------------------------------------------------------------------------------------------------------------------------------------------------------------------------------------------------------------------------------------------------------------------------------------------------------------------------------------------------------------------------------------------------------------------------------------------------------------------------------------------------------------------------------------------------------------------------------------------------------------------------------------------------------------------------------------------------------------------------------------------------------------------------------------------------------------------------------------------------------------------------------------------------------------------------------------------------------------------------------------------------------------------------------------------------------------------------------------------------------------------------------------------------------------------------------------------------------------------------------------------------------------------------------------------------------------------------------------------------------------------------------------------------------------------------------------------------------------------------------------------------------------------------------------------------------------------------------------------------------------------------------------------------------------------------------------------------------------------------------------------------------------|------|
| 2-s2.0-59249096785                                                                                                                                     | "Hungarian" ) OR EXCLUDE ( LANGUAGE , "Japanese" ) OR EXCLUDE ( LANGUAGE , "Korean" ) OR EXCLUDE ( LANGUAGE , "Ukrainian" ) OR EXCLUDE ( LANGUAGE , "Polish" ) OR EXCLUDE ( LANGUAGE , "Chinese" ) )                                                                                                                                                                                                                                                                                                                                                                                                                                                                                                                                                                                                                                                                                                                                                                                                                                                                                                                                                                                                                                                                                                                                                                                                                                                                                                                                                                                                                                                                                                                                                                                                                                                                                                                                                                                                                                                                                                                                                                                                                                                                                                                                                                                                                                                                                                                                                                                                |      |
| Removed further unwanted papers using AND NOT TITLE-ABS-KEY ( nuclear AND magnetic AND resonance OR mercury AND injection AND capillary AND pressure ) | TITLE-ABS-KEY ( ( micp ) OR ( microbial AND induced AND carbonate AND precipitation ) OR ( microbial AND induced AND calcite AND precipitation ) OR ( microbially AND induced AND calcium AND carbonate AND precipitation ) AND ( hydrology ) OR ( hydraulic AND conductivities ) OR ( fluid AND injection AND experiments ) OR ( infiltration ) OR ( cementation AND solution ) OR ( injection AND rates ) OR ( fracture AND development ) OR ( matrix AND flow ) OR ( permeability ) OR ( hydraulic AND properties ) OR ( porosity ) OR ( flow AND processes ) OR ( fracture AND patterns ) OR ( pore AND volume AND ratio ) OR ( injection AND rate ) OR ( soil-water AND repellency ) OR ( aquifer AND storage ) OR ( flow AND rate ) OR ( syringe AND pump ) OR ( geo-environmental AND engineering ) OR ( groundwater AND hydraulics ) OR ( porous AND media ) OR ( water AND resources ) OR ( contaminant AND hydrology ) OR ( urea AND hydrolysis ) OR ( pore AND network ) OR ( crystal AND growth ) OR ( chemical AND precipitation ) OR ( adsorption ) OR ( ion AND exchange ) OR ( toxic AND metals ) OR ( groundwater AND hydraulics ) OR ( breakdown AND pressure ) OR ( viscous AND fluid ) OR ( infiltration AND dominance ) ) AND NOT ( title AND review ) AND NOT EID ( 2-s2.0-1842719781 OR 2-s2.0-0036800835 OR 2-s2.0-33748045836 OR 2-s2.0-0034793915 OR 2-s2.0-41049109163 OR 2-s2.0-84864310755 OR 2-s2.0-0030426444 OR 2-s2.0-0036827271 OR 2-s2.0-33947313011 OR 2-s2.0-84855821379 OR 2-s2.0-77649178057 OR 2-s2.0-33749099519 OR 2-s2.0-0342632433 OR 2-s2.0-84862266120 OR 2-s2.0-25144456050 OR 2-s2.0-0034932442 OR 2-s2.0-84873324461 OR 2-s2.0-0000112293 OR 2-s2.0-15744380435 OR 2-s2.0-32844474159 OR 2-s2.0-0035973222 OR 2-s2.0-33845709797 OR 2-s2.0-79955791180 OR 2-s2.0-33745130782 OR 2-s2.0-1542290606 OR 2-s2.0-53349107368 OR 2-s2.0-84863305456 OR 2-s2.0-33644866869 OR 2-s2.0-14344273767 OR 2-s2.0-84858704724 OR 2-s2.0-0033166304 OR 2-s2.0-84858986512 OR 2-s2.0-5044226966 OR 2-s2.0-0033387133 OR 2-s2.0-84873317955 OR 2-s2.0-64549116273 OR 2-s2.0-58149474174 OR 2-s2.0-80054948468 OR 2-s2.0-79955836066 OR 2-s2.0-79955545914 OR 2-s2.0-84857910088 OR 2-s2.0-4243148638 OR 2-s2.0-0030752246 OR 2-s2.0-70350154696 OR 2-s2.0-0028986254 OR 2-s2.0-77954009948 OR 2-s2.0-21344456796 OR 2-s2.0-84859620933 OR 2-s2.0-59249096785 ) AND NOT TITLE-ABS-KEY ( nuclear AND magnetic AND resonance OR mercury AND injection AND capillary AND pressure ) AND ( EXCLUDE ( SRCTYPE , "d" ) OR EXCLUDE ( SRCTYPE , "k" ) OR EXCLUDE ( SRCTYPE , | 1098 |

---

"p" ) ) AND ( EXCLUDE ( DOCTYPE , "er" ) OR EXCLUDE ( DOCTYPE , "cr" ) OR EXCLUDE ( DOCTYPE , "ch" ) OR EXCLUDE ( DOCTYPE , "re" ) OR EXCLUDE ( DOCTYPE , "cp" ) OR EXCLUDE ( DOCTYPE , "no" ) ) AND ( EXCLUDE ( LANGUAGE , "French" ) OR EXCLUDE ( LANGUAGE , "Hungarian" ) OR EXCLUDE ( LANGUAGE , "Japanese" ) OR EXCLUDE ( LANGUAGE , "Korean" ) OR EXCLUDE ( LANGUAGE , "Ukrainian" ) OR EXCLUDE ( LANGUAGE , "Polish" ) OR EXCLUDE ( LANGUAGE , "Chinese" ) ) )

---

**Table S2.** Important information about 10 prolific authors available in Scopus database.

| Authors          | Affiliation                                       | Scopus      | ORCID               |
|------------------|---------------------------------------------------|-------------|---------------------|
| Chu, Jian        | Nanyang Technological University                  | 25026007400 | 0000-0003-1404-1834 |
| Su, Junfeng      | Xi'an University of Architecture and Technology   | 14021906000 | 0000-0001-8434-0851 |
| Wang, Zhao       | Xi'an University of Architecture and Technology   | 57208427889 | nil                 |
| Ali, Amjad       | Xi'an University of Architecture and Technology   | 56991900200 | nil                 |
| Achal, Varennyam | Guangdong Technion-Israel Institute of Technology | 15076974200 | 0000-0001-5444-7746 |
| Cheng, Liang     | Jiangsu University                                | 55474102700 | 0000-0002-1767-2108 |
| Kawasaki, Satoru | Hokkaido University                               | 54782723900 | nil                 |
| Dejong, Jason T. | College of Engineering                            | 7005368829  | 0000-0002-9809-955X |
| Gerlach, Robin   | Montana State University                          | 57189020312 | nil                 |
| Liu, Hanlong     | Chongqing University                              | 26643629700 | 0000-0002-9411-4660 |

**Table S3.** Other information about top Journals in the field.

| <b>Journals</b>                                          | <b>Country<br/>of Journal</b> | <b>CiteScore<br/>2023</b> | <b>Quartile<br/>ranking</b> |
|----------------------------------------------------------|-------------------------------|---------------------------|-----------------------------|
| Construction and Building Materials                      | United Kingdom                | 13.5                      | Q1                          |
| Journal of Petroleum Science and Engineering             | Netherlands                   | 11.1                      | Q1                          |
| Journal of Geotechnical and Geoenvironmental Engineering | United States                 | 7.3                       | Q1                          |
| Marine and Petroleum Geology                             | Netherlands                   | 8.6                       | Q1                          |
| Journal of Materials in Civil Engineering                | United States                 | 5.7                       | Q1                          |
| Journal of Natural Gas Science and Engineering           | Netherlands                   | 8.9                       | Q1                          |
| Chemosphere                                              | United Kingdom                | 15.6                      | Q1                          |
| Geomicrobiology Journal                                  | United Kingdom                | 4.7                       | Q2                          |
| Acta Geotechnica                                         | Germany                       | 9.7                       | Q1                          |
| Journal of Environmental Management                      | United States                 | 13.4                      | Q1                          |

**Table S4.** Top 15 author keywords

| <b>Keywords</b>               | <b>Occurrences</b> | <b>Total<br/>strengths</b> | <b>link</b> |
|-------------------------------|--------------------|----------------------------|-------------|
| MICP                          | 162                | 222                        |             |
| Calcium carbonate             | 63                 | 106                        |             |
| Permeability                  | 60                 | 109                        |             |
| <i>Sporosarcina pasteurii</i> | 57                 | 95                         |             |
| Bio mineralization            | 55                 | 81                         |             |
| Urease                        | 51                 | 116                        |             |
| Bacteria                      | 36                 | 73                         |             |
| Self-healing                  | 35                 | 65                         |             |
| Soil improvement              | 35                 | 68                         |             |
| Calcite                       | 34                 | 68                         |             |
| Pores structure               | 33                 | 32                         |             |
| Porosity                      | 32                 | 48                         |             |
| Concrete                      | 30                 | 53                         |             |
| Biocementation                | 26                 | 47                         |             |
| pore size distribution        | 24                 | 30                         |             |

**Table S5.** Evolution of MICP research from 1999 to 2024

| Research era/phase | Key trends                                                                                                                                                                      |
|--------------------|---------------------------------------------------------------------------------------------------------------------------------------------------------------------------------|
| 1999-2005          | Initial studies laid the foundation for MICP, focusing on microbial processes and calcite precipitation mechanisms. Research primarily conducted in laboratory settings.        |
| 2006-2012          | Increased interest in MICP applications for soil stabilization, bioremediation, and construction. Exploration of different microorganisms and nutrient formulations.            |
| 2013-2017          | Significant growth in research output, shifting towards field trials and practical applications. Focus on optimizing MICP for large-scale applications and material durability. |
| 2018-2024          | Continued growth in research, addressing challenges and limitations. Focus on hydrodynamics, novel microbial strains, and additives for enhanced performance and applications.  |

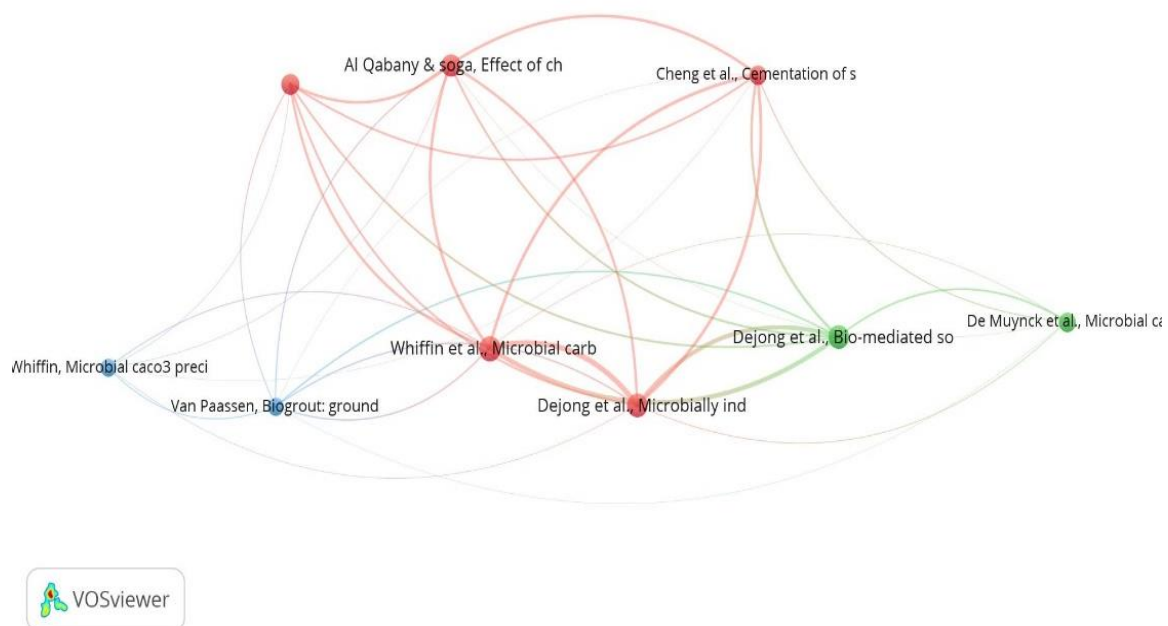

**Figure S1.** Network visualisation of the top most co-cited references in the field. The online map is available at <https://bit.ly/3UMSpYG>



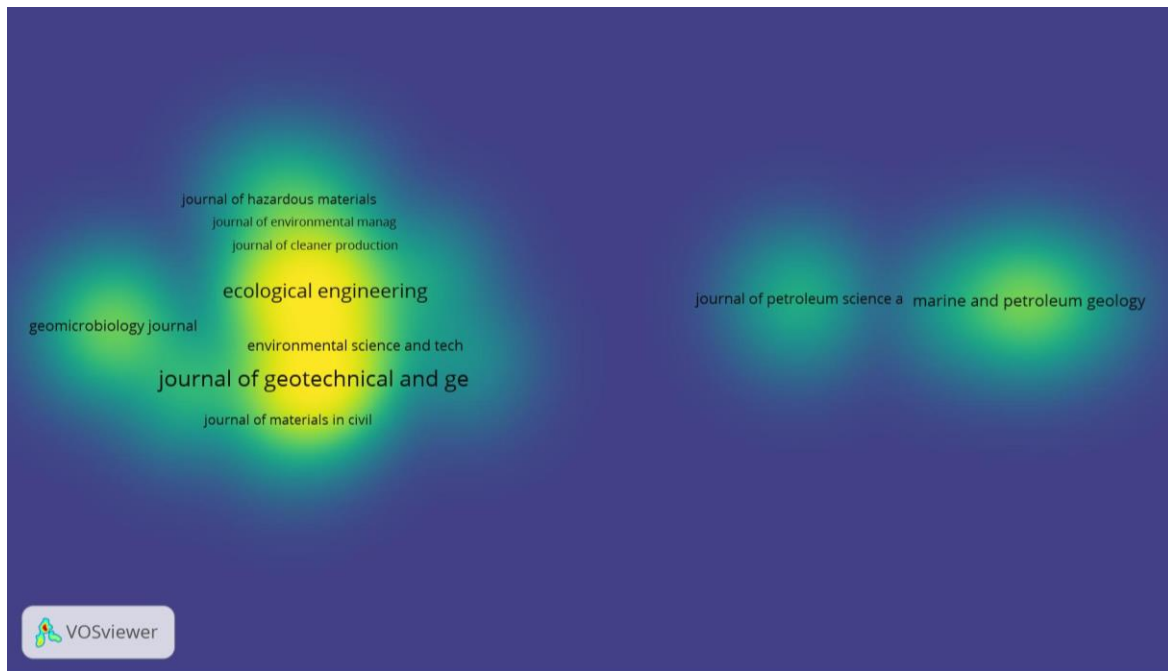

**Figure S2.** Network visualisation of bibliographic coupling of journals. The online map is available at <https://bit.ly/3wgsZZa>

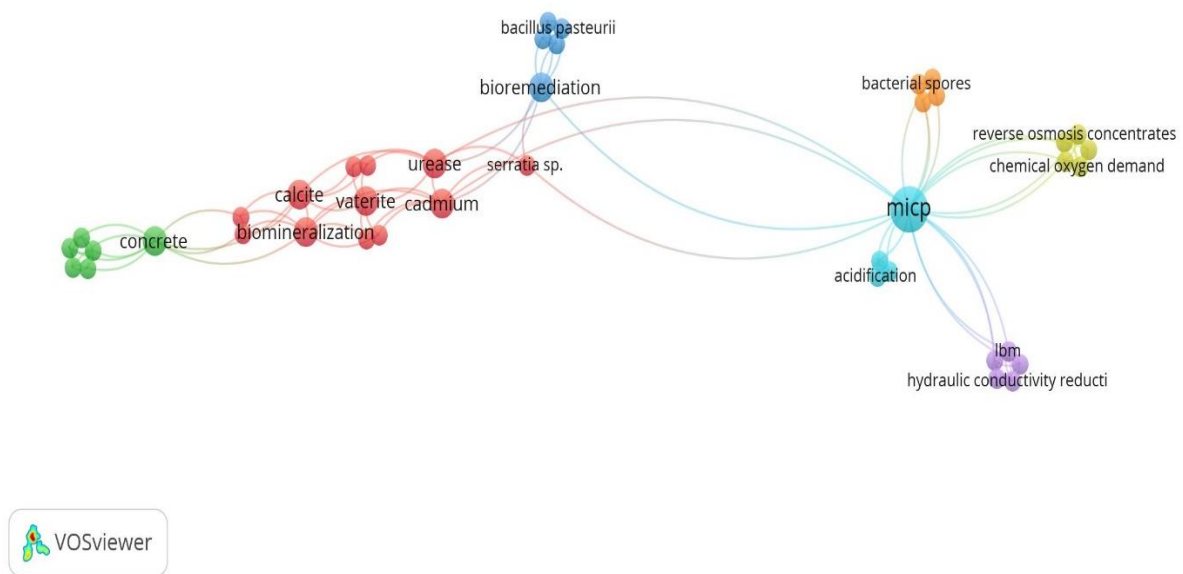

**Figure S3.** Network visualisation of co-occurrence of author keywords from only 2024 publications. The online map is available at <https://bit.ly/3OOqCDq>

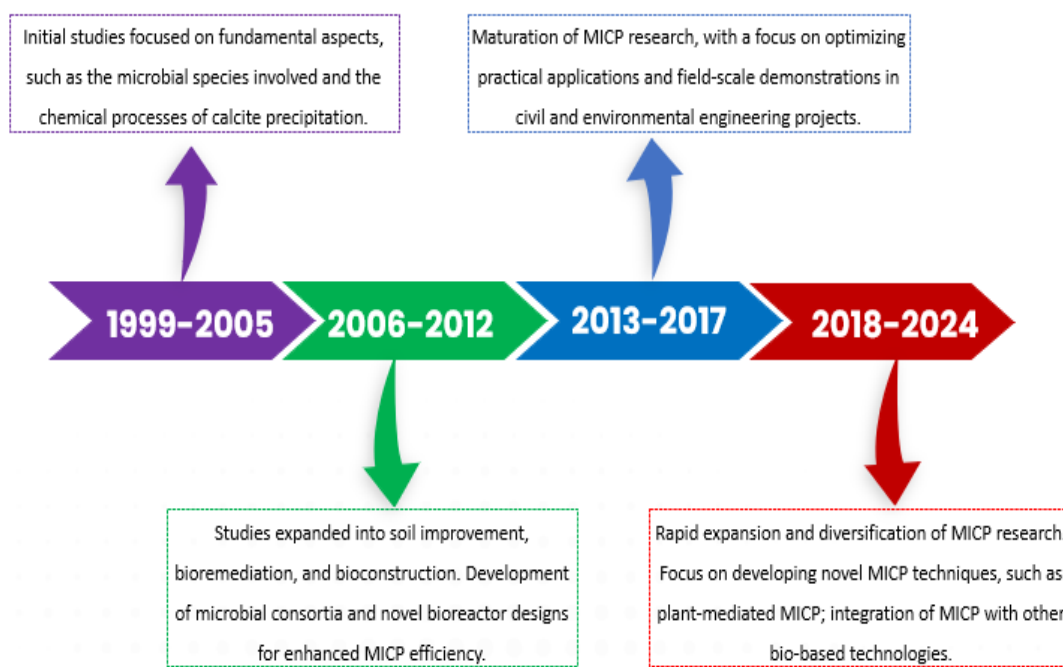

**Figure S4.** Research evolution and focus in the field.
